# Supplementary material for: A Novel Ensemble Learning-Based Computational Method to Predict Protein-Protein Interactions from Protein Primary Sequences
Source: MDPI journal article supplement (doi:10.3390/biology11050775), 2022-05-19
Supplement: s1 [file s1]

In this part, we divide the PPIs dataset into 10 equal parts, 8 of which are subjected to five-fold cross-validation to find the optimal parameters of the rotated forest (feature subset number  $K$  and decision trees number  $L$ ). The remaining two copies are used as the test set to make predictions. All the final parameters are shown in the following Table S1-S4.

**Table S1.** The optimal model parameters ( $K$  and  $L$ ) on the three PPIs datasets.

|                     | $K$ | $L$ | validation Acc | validation AUC | Testing Acc | Testing AUC |
|---------------------|-----|-----|----------------|----------------|-------------|-------------|
| <i>Yeast</i>        | 13  | 21  | 91.75±0.52%    | 0.9585±0.0032  | 90.88       | 0.9566      |
| <i>Human</i>        | 9   | 27  | 96.10±0.46%    | 0.9834±0.0038  | 96.51       | 0.9828      |
| <i>Oryza sativa</i> | 15  | 25  | 94.41±0.43%    | 0.9671±0.0010  | 94.11       | 0.9632      |

**Table S2.** The prediction results obtained by (train/test/validation) based method on the *Yeast* dataset.

| Dataset     | Acc (%)    | Sens (%)   | Spec (%)   | PR (%)     | MCC (%)    | AUC           |
|-------------|------------|------------|------------|------------|------------|---------------|
| 1           | 91.15      | 90.02      | 92.31      | 92.30      | 83.86      | 0.9533        |
| 2           | 91.64      | 90.13      | 93.14      | 92.88      | 84.67      | 0.9614        |
| 3           | 92.27      | 89.78      | 94.74      | 94.43      | 85.71      | 0.9602        |
| 4           | 92.31      | 90.55      | 94.15      | 94.18      | 85.80      | 0.9576        |
| 5           | 91.37      | 89.15      | 93.74      | 92.82      | 84.19      | 0.9598        |
| Average     | 91.75±0.52 | 89.92±0.51 | 93.56±0.93 | 93.32±0.93 | 84.85±0.88 | 0.9585±0.0032 |
| Testing set | 91.73      | 89.93      | 93.75      | 93.48      | 84.82      | 0.9600        |

**Table S3.** The prediction results obtained by (train/test/validation) based method on the *Human* dataset.

| Dataset     | Acc (%)    | Sens (%)   | Spec (%)   | PR (%)     | MCC (%)    | AUC           |
|-------------|------------|------------|------------|------------|------------|---------------|
| 1           | 96.02      | 94.84      | 97.08      | 96.71      | 92.32      | 0.9832        |
| 2           | 95.47      | 95.11      | 95.81      | 95.59      | 91.34      | 0.9778        |
| 3           | 96.14      | 96.60      | 95.70      | 95.52      | 92.57      | 0.9852        |
| 4           | 96.75      | 95.19      | 98.07      | 97.67      | 93.66      | 0.9827        |
| 5           | 96.14      | 95.15      | 97.06      | 96.75      | 92.56      | 0.9881        |
| Average     | 96.10±0.46 | 95.38±0.70 | 96.75±0.99 | 96.45±0.90 | 92.49±0.83 | 0.9834±0.0038 |
| Testing set | 95.77      | 94.58      | 96.85      | 95.37      | 91.87      | 0.9845        |

**Table S4.** The prediction results obtained by (train/test/validation) based method on the *Oryza sativa* dataset.

| Dataset     | Acc (%)    | Sens (%)   | Spec (%)   | PR (%)     | MCC (%)    | AUC           |
|-------------|------------|------------|------------|------------|------------|---------------|
| 1           | 93.85      | 94.64      | 93.12      | 92.84      | 88.64      | 0.9666        |
| 2           | 94.74      | 94.53      | 94.84      | 94.53      | 90.02      | 0.9677        |
| 3           | 94.84      | 84.80      | 94.59      | 94.80      | 90.22      | 0.9666        |
| 4           | 94.53      | 93.89      | 93.90      | 93.89      | 89.66      | 0.9659        |
| 5           | 94.06      | 95.32      | 94.97      | 95.32      | 88.81      | 0.9685        |
| Average     | 94.41±0.43 | 94.55±0.78 | 94.28±0.77 | 94.28±0.99 | 89.43±0.77 | 0.9671±0.0010 |
| Testing set | 94.11      | 94.74      | 93.52      | 93.24      | 88.92      | 0.9632        |
